# Supplementary material for: Outcomes comparison of testicular versus ejaculated sperm for intracytoplasmic sperm injection in infertile men with high DNA fragmentation: updated systematic review and meta-analysis
Source: PubMed Central journal article supplement — Transl Androl Urol. 2023 Dec 21;12(12):1785–802. doi: 10.21037/tau-23-415 (PMC10772647; doi:10.21037/tau-23-415), 2023-12-21
Supplement: tau-12-12-1785-supplementary.pdf [file tau-12-12-1785-supplementary.pdf]

**Table S1** The PICOS design structure for literature search strategy

|                                                                                                                                                                                                                                                                             |
|-----------------------------------------------------------------------------------------------------------------------------------------------------------------------------------------------------------------------------------------------------------------------------|
| Population                                                                                                                                                                                                                                                                  |
| The males with high SDF in the ejaculate semen                                                                                                                                                                                                                              |
| Intervention                                                                                                                                                                                                                                                                |
| Testi-ICSI vs. Ejac-ICSI                                                                                                                                                                                                                                                    |
| Comparison                                                                                                                                                                                                                                                                  |
| Primary pregnancy outcomes between Testi-ICSI and Ejac-ICSI among couples with high SDF in the ejaculate semen, and SDF level between the ejaculate semen and testicular sperm in above couples if provided available data                                                  |
| Outcomes                                                                                                                                                                                                                                                                    |
| SDF level between the ejaculate semen and testicular sperm, primary pregnancy outcomes including live birth rate (per cycle), fertilization rate, clinical pregnancy rate, miscarriage rate and live birth rate, SDF level between the ejaculate semen and testicular sperm |
| Study                                                                                                                                                                                                                                                                       |
| RCT and prospective or retrospective non-randomized observational studies that enrolled human participants                                                                                                                                                                  |

PICOS, Population, Intervention, Comparison, Outcomes, Study; SDF, sperm DNA fragmentation; Testi-ICSI, intracytoplasmic sperm injection with testicular sperm; Ejac-ICSI, intracytoplasmic sperm injection with ejaculated sperm; RCT, randomized controlled trial.

**Table S2** Quality assessment of all included studies\*

| Study                            | The criteria for nonrandomized studies |                                   |                                         |                                                    |                          |                                  |                                       | Overall bias<br>Risk of bias judgment |
|----------------------------------|----------------------------------------|-----------------------------------|-----------------------------------------|----------------------------------------------------|--------------------------|----------------------------------|---------------------------------------|---------------------------------------|
|                                  | Pre-intervention                       |                                   | At intervention                         | Post-intervention                                  |                          |                                  |                                       |                                       |
|                                  | Bias due to confounding                | Bias in selection of participants | Bias in classification of interventions | Bias due to deviations from intended interventions | Bias due to missing data | Bias in measurements of outcomes | Bias in selection of reported results |                                       |
| Prospective observational cohort |                                        |                                   |                                         |                                                    |                          |                                  |                                       |                                       |
| Moskovtsev 2010                  | Moderate risk                          | Moderate risk                     | Low risk                                | Low risk                                           | Low risk                 | Moderate risk                    | Low risk                              | Moderate risk                         |
| Moskovtsev 2012                  | Moderate risk                          | Moderate risk                     | Low risk                                | Low risk                                           | Low risk                 | Moderate risk                    | Low risk                              | Moderate risk                         |
| Esteves 2015                     | Moderate risk                          | Low risk                          | Low risk                                | Low risk                                           | Low risk                 | Moderate risk                    | Low risk                              | Moderate risk                         |
| Arafa 2017                       | Moderate risk                          | Moderate risk                     | Low risk                                | Low risk                                           | Low risk                 | Low risk                         | Low risk                              | Moderate risk                         |
| Retrospective cohort             |                                        |                                   |                                         |                                                    |                          |                                  |                                       |                                       |
| Lewis 2004                       | Moderate risk                          | Serious risk                      | Moderate risk                           | Low risk                                           | Low risk                 | Low risk                         | Low risk                              | Serious risk                          |
| Greco 2005                       | Moderate risk                          | Serious risk                      | Low risk                                | Low risk                                           | Low risk                 | Moderate risk                    | Low risk                              | Serious risk                          |
| Bradley 2016                     | Moderate risk                          | Moderate risk                     | Moderate risk                           | Low risk                                           | Low risk*                | Moderate risk                    | Low risk                              | Moderate risk                         |
| Pabuccu 2016                     | Moderate risk                          | Low risk                          | Low risk                                | Low risk                                           | Low risk                 | Low risk                         | Low risk                              | Low risk                              |
| Zhang 2019                       | Moderate risk                          | Low risk                          | Low risk                                | Low risk                                           | Low risk                 | Low risk                         | Low risk                              | Low risk                              |
| Herrero 2019                     | Moderate risk                          | Low risk                          | Low risk                                | Low risk                                           | Low risk                 | Low risk                         | Low risk                              | Low risk                              |
| Alharbi 2020                     | Moderate risk                          | low risk                          | Moderate risk                           | Low risk                                           | Low risk                 | Low risk                         | Low risk                              | Moderate risk                         |

\*, the ROBINS-I tool was used to rate risk of bias for all non-randomised included studies. ROBINS-I, Risk Of Bias In Non-randomized Studies of Interventions.

**Table S3** Sensitivity analysis for the effect of removal of individual studies on the mean SDF rates in testicular and ejaculated sperm

| Included studies                | Excluded study                  | Mean difference (95% CI) | I <sup>2</sup> |
|---------------------------------|---------------------------------|--------------------------|----------------|
| All                             | None                            | -25.81 (-34.82, -16.81)  | 94%            |
| Greco <i>et al.</i> , 2005      | Esteves <i>et al.</i> , 2015    | -21.83 (-27.28, -16.37)  | 43%            |
| Moskovtsev <i>et al.</i> , 2010 |                                 |                          |                |
| Moskovtsev <i>et al.</i> , 2012 |                                 |                          |                |
| Esteves <i>et al.</i> , 2015    | Greco <i>et al.</i> , 2005      | -30.50 (-34.76, -26.25)  | 27%            |
| Moskovtsev <i>et al.</i> , 2010 |                                 |                          |                |
| Moskovtsev <i>et al.</i> , 2012 |                                 |                          |                |
| Esteves <i>et al.</i> , 2015    | Moskovtsev <i>et al.</i> , 2010 | -25.65 (-36.45, -14.84)  | 96%            |
| Greco <i>et al.</i> , 2005      |                                 |                          |                |
| Moskovtsev <i>et al.</i> , 2012 |                                 |                          |                |
| Esteves <i>et al.</i> , 2015    | Moskovtsev <i>et al.</i> , 2012 | -25.85 (-36.41, -15.29)  | 96%            |
| Greco <i>et al.</i> , 2005      |                                 |                          |                |
| Moskovtsev <i>et al.</i> , 2010 |                                 |                          |                |

SDF, sperm DNA fragmentation; CI, confidence interval.

**Table S4** Sensitivity analysis for the effect of removal of individual studies on fertilization rates

| Included studies             | Excluded study               | Odds ratio (95% CI) | I <sup>2</sup> |
|------------------------------|------------------------------|---------------------|----------------|
| All                          | None                         | 0.87 (0.61, 1.12)   | 81%            |
| Arafa <i>et al.</i> , 2018   | Alharbi <i>et al.</i> , 2020 | 0.86 (0.63, 1.18)   | 83%            |
| Bradley <i>et al.</i> , 2016 |                              |                     |                |
| Esteves <i>et al.</i> , 2015 |                              |                     |                |
| Greco <i>et al.</i> , 2005   |                              |                     |                |
| Pabuccu <i>et al.</i> , 2017 |                              |                     |                |
| Alharbi <i>et al.</i> , 2020 | Arafa <i>et al.</i> , 2018   | 0.83 (0.62, 1.10)   | 80%            |
| Bradley <i>et al.</i> , 2016 |                              |                     |                |
| Esteves <i>et al.</i> , 2015 |                              |                     |                |
| Greco <i>et al.</i> , 2005   |                              |                     |                |
| Pabuccu <i>et al.</i> , 2017 |                              |                     |                |
| Alharbi <i>et al.</i> , 2020 | Bradley <i>et al.</i> , 2016 | 0.93 (0.68, 1.27)   | 82%            |
| Arafa <i>et al.</i> , 2018   |                              |                     |                |
| Esteves <i>et al.</i> , 2015 |                              |                     |                |
| Greco <i>et al.</i> , 2005   |                              |                     |                |
| Pabuccu <i>et al.</i> , 2017 |                              |                     |                |
| Alharbi <i>et al.</i> , 2020 | Esteves <i>et al.</i> , 2015 | 0.95 (0.75, 1.20)   | 68%            |
| Arafa <i>et al.</i> , 2018   |                              |                     |                |
| Bradley <i>et al.</i> , 2016 |                              |                     |                |
| Greco <i>et al.</i> , 2005   |                              |                     |                |
| Pabuccu <i>et al.</i> , 2017 |                              |                     |                |
| Alharbi <i>et al.</i> , 2020 | Greco <i>et al.</i> , 2005   | 0.82 (0.63, 1.28)   | 82%            |
| Arafa <i>et al.</i> , 2018   |                              |                     |                |
| Bradley <i>et al.</i> , 2016 |                              |                     |                |
| Esteves <i>et al.</i> , 2015 |                              |                     |                |
| Pabuccu <i>et al.</i> , 2017 |                              |                     |                |
| Alharbi <i>et al.</i> , 2020 | Pabuccu <i>et al.</i> , 2017 | 0.82 (0.63, 1.09)   | 82%            |
| Arafa <i>et al.</i> , 2018   |                              |                     |                |
| Bradley <i>et al.</i> , 2016 |                              |                     |                |
| Esteves <i>et al.</i> , 2015 |                              |                     |                |
| Greco <i>et al.</i> , 2005   |                              |                     |                |

CI, confidence interval.

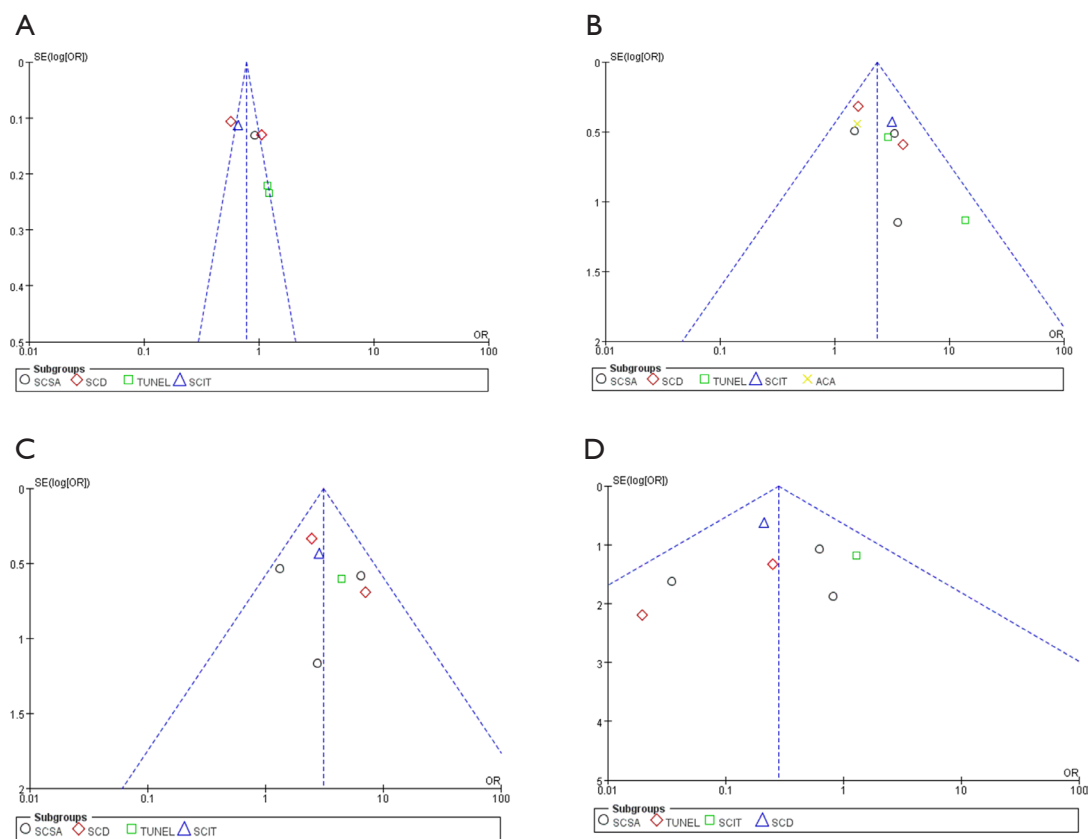

**Figure S1** Funnel plots were constructed for Publication bias: (A) fertilization rates; (B) clinical pregnancy rates; (C) live birth rates; (D) miscarriage rates. SCSA, sperm chromatin structure assay; SCD, sperm chromatin dispersion; TUNEL, terminal deoxynucleotidyl transferase dUTP nick end labelling; SCIT, sperm chromatin integrity test; ACA, alkaline comet assay; OR, odds ratio; SE, standard error.

**Table S5** Sensitivity analysis for the effect of removal of individual studies on clinical pregnancy rates

| Included studies             | Excluded study               | Odds ratio (95% CI) | I <sup>2</sup> |
|------------------------------|------------------------------|---------------------|----------------|
| All                          | None                         | 2.36 (1.71, 3.24)   | 0%             |
| Arafa <i>et al.</i> , 2018   | Alharbi <i>et al.</i> , 2020 | 2.49 (1.77, 3.49)   | 0%             |
| Bradley <i>et al.</i> , 2016 |                              |                     |                |
| Esteves <i>et al.</i> , 2015 |                              |                     |                |
| Greco <i>et al.</i> , 2005   |                              |                     |                |
| Herrero <i>et al.</i> , 2019 |                              |                     |                |
| Lewis <i>et al.</i> , 2004   |                              |                     |                |
| Pabuccu <i>et al.</i> , 2017 |                              |                     |                |
| Zhang <i>et al.</i> , 2019   |                              |                     |                |

**Table S5** (continued)

Table S5 (continued)

| Included studies                                                                                                                                                                                                                                       | Excluded study               | Odds ratio (95% CI) | I <sup>2</sup> |
|--------------------------------------------------------------------------------------------------------------------------------------------------------------------------------------------------------------------------------------------------------|------------------------------|---------------------|----------------|
| Alharbi <i>et al.</i> , 2020<br>Bradley <i>et al.</i> , 2016<br>Esteves <i>et al.</i> , 2015<br>Greco <i>et al.</i> , 2005<br>Herrero <i>et al.</i> , 2019<br>Lewis <i>et al.</i> , 2004<br>Pabuccu <i>et al.</i> , 2017<br>Zhang <i>et al.</i> , 2019 | Arafa <i>et al.</i> , 2018   | 2.25 (1.62, 3.14)   | 0%             |
| Alharbi <i>et al.</i> , 2020<br>Arafa <i>et al.</i> , 2018<br>Esteves <i>et al.</i> , 2015<br>Greco <i>et al.</i> , 2005<br>Herrero <i>et al.</i> , 2019<br>Lewis <i>et al.</i> , 2004<br>Pabuccu <i>et al.</i> , 2017<br>Zhang <i>et al.</i> , 2019   | Bradley <i>et al.</i> , 2016 | 2.24 (1.58, 3.16)   | 0%             |
| Alharbi <i>et al.</i> , 2020<br>Arafa <i>et al.</i> , 2018<br>Bradley <i>et al.</i> , 2016<br>Greco <i>et al.</i> , 2005<br>Herrero <i>et al.</i> , 2019<br>Lewis <i>et al.</i> , 2004<br>Pabuccu <i>et al.</i> , 2017<br>Zhang <i>et al.</i> , 2019   | Esteves <i>et al.</i> , 2015 | 2.70 (1.86, 3.93)   | 0%             |
| Alharbi <i>et al.</i> , 2020<br>Arafa <i>et al.</i> , 2018<br>Bradley <i>et al.</i> , 2016<br>Esteves <i>et al.</i> , 2015<br>Herrero <i>et al.</i> , 2019<br>Lewis <i>et al.</i> , 2004<br>Pabuccu <i>et al.</i> , 2017<br>Zhang <i>et al.</i> , 2019 | Greco <i>et al.</i> , 2005   | 2.31 (1.65, 3.23)   | 4%             |

Table S5 (continued)

Table S5 (continued)

| Included studies             | Excluded study               | Odds ratio (95% CI) | I <sup>2</sup> |
|------------------------------|------------------------------|---------------------|----------------|
| Alharbi <i>et al.</i> , 2020 | Herrero <i>et al.</i> , 2019 | 2.33 (1.69, 3.22)   | 5%             |
| Arafa <i>et al.</i> , 2018   |                              |                     |                |
| Bradley <i>et al.</i> , 2016 |                              |                     |                |
| Esteves <i>et al.</i> , 2015 |                              |                     |                |
| Greco <i>et al.</i> , 2005   |                              |                     |                |
| Lewis <i>et al.</i> , 2004   |                              |                     |                |
| Pabuccu <i>et al.</i> , 2017 |                              |                     |                |
| Zhang <i>et al.</i> , 2019   |                              |                     |                |
| Alharbi <i>et al.</i> , 2020 | Lewis <i>et al.</i> , 2004   | 2.51 (1.78, 3.54)   | 0%             |
| Arafa <i>et al.</i> , 2018   |                              |                     |                |
| Bradley <i>et al.</i> , 2016 |                              |                     |                |
| Esteves <i>et al.</i> , 2015 |                              |                     |                |
| Greco <i>et al.</i> , 2005   |                              |                     |                |
| Herrero <i>et al.</i> , 2019 |                              |                     |                |
| Pabuccu <i>et al.</i> , 2017 |                              |                     |                |
| Zhang <i>et al.</i> , 2019   |                              |                     |                |
| Alharbi <i>et al.</i> , 2020 | Pabuccu <i>et al.</i> , 2017 | 2.23 (1.61, 3.09)   | 0%             |
| Arafa <i>et al.</i> , 2018   |                              |                     |                |
| Bradley <i>et al.</i> , 2016 |                              |                     |                |
| Esteves <i>et al.</i> , 2015 |                              |                     |                |
| Greco <i>et al.</i> , 2005   |                              |                     |                |
| Herrero <i>et al.</i> , 2019 |                              |                     |                |
| Lewis <i>et al.</i> , 2004   |                              |                     |                |
| Zhang <i>et al.</i> , 2019   |                              |                     |                |
| Alharbi <i>et al.</i> , 2020 | Zhang <i>et al.</i> , 2019   | 2.26 (1.62, 3.17)   | 0%             |
| Arafa <i>et al.</i> , 2018   |                              |                     |                |
| Bradley <i>et al.</i> , 2016 |                              |                     |                |
| Esteves <i>et al.</i> , 2015 |                              |                     |                |
| Greco <i>et al.</i> , 2005   |                              |                     |                |
| Herrero <i>et al.</i> , 2019 |                              |                     |                |
| Lewis <i>et al.</i> , 2004   |                              |                     |                |
| Pabuccu <i>et al.</i> , 2017 |                              |                     |                |

CI, confidence interval.

**Table S6** Sensitivity analysis for the effect of removal of individual studies on live birth rates

| Included studies             | Excluded study               | Odds ratio (95% CI) | I <sup>2</sup> |
|------------------------------|------------------------------|---------------------|----------------|
| All                          | None                         | 3.10 (2.13, 4.51)   | 4%             |
| Arafa <i>et al.</i> , 2018   | Alharbi <i>et al.</i> , 2020 | 3.50 (2.33, 5.25)   | 0%             |
| Bradley <i>et al.</i> , 2016 |                              |                     |                |
| Esteves <i>et al.</i> , 2015 |                              |                     |                |
| Herrero <i>et al.</i> , 2019 |                              |                     |                |
| Pabuccu <i>et al.</i> , 2017 |                              |                     |                |
| Zhang <i>et al.</i> , 2019   |                              |                     |                |
| Alharbi <i>et al.</i> , 2020 | Arafa <i>et al.</i> , 2018   | 2.86 (1.93, 4.24)   | 0%             |
| Bradley <i>et al.</i> , 2016 |                              |                     |                |
| Esteves <i>et al.</i> , 2015 |                              |                     |                |
| Herrero <i>et al.</i> , 2019 |                              |                     |                |
| Pabuccu <i>et al.</i> , 2017 |                              |                     |                |
| Zhang <i>et al.</i> , 2019   |                              |                     |                |
| Alharbi <i>et al.</i> , 2020 | Bradley <i>et al.</i> , 2016 | 3.16 (2.08, 4.80)   | 20%            |
| Arafa <i>et al.</i> , 2018   |                              |                     |                |
| Esteves <i>et al.</i> , 2015 |                              |                     |                |
| Herrero <i>et al.</i> , 2019 |                              |                     |                |
| Pabuccu <i>et al.</i> , 2017 |                              |                     |                |
| Zhang <i>et al.</i> , 2019   |                              |                     |                |
| Alharbi <i>et al.</i> , 2020 | Esteves <i>et al.</i> , 2015 | 3.45 (2.18, 5.48)   | 12%            |
| Arafa <i>et al.</i> , 2018   |                              |                     |                |
| Bradley <i>et al.</i> , 2016 |                              |                     |                |
| Herrero <i>et al.</i> , 2019 |                              |                     |                |
| Pabuccu <i>et al.</i> , 2017 |                              |                     |                |
| Zhang <i>et al.</i> , 2019   |                              |                     |                |
| Alharbi <i>et al.</i> , 2020 | Herrero <i>et al.</i> , 2019 | 3.11 (2.12, 4.55)   | 20%            |
| Arafa <i>et al.</i> , 2018   |                              |                     |                |
| Bradley <i>et al.</i> , 2016 |                              |                     |                |
| Esteves <i>et al.</i> , 2015 |                              |                     |                |
| Pabuccu <i>et al.</i> , 2017 |                              |                     |                |
| Zhang <i>et al.</i> , 2019   |                              |                     |                |

Table S6 (continued)

**Table S6** (continued)

| Included studies             | Excluded study               | Odds ratio (95% CI) | I <sup>2</sup> |
|------------------------------|------------------------------|---------------------|----------------|
| Alharbi <i>et al.</i> , 2020 | Pabuccu <i>et al.</i> , 2017 | 2.98 (2.00, 4.43)   | 14%            |
| Arafa <i>et al.</i> , 2018   |                              |                     |                |
| Bradley <i>et al.</i> , 2016 |                              |                     |                |
| Esteves <i>et al.</i> , 2015 |                              |                     |                |
| Herrero <i>et al.</i> , 2019 |                              |                     |                |
| Zhang <i>et al.</i> , 2019   |                              |                     |                |
| Alharbi <i>et al.</i> , 2020 | Zhang <i>et al.</i> , 2019   | 2.78 (1.86, 4.15)   | 0%             |
| Arafa <i>et al.</i> , 2018   |                              |                     |                |
| Bradley <i>et al.</i> , 2016 |                              |                     |                |
| Esteves <i>et al.</i> , 2015 |                              |                     |                |
| Herrero <i>et al.</i> , 2019 |                              |                     |                |
| Pabuccu <i>et al.</i> , 2017 |                              |                     |                |

CI, confidence interval.

**Table S7** Sensitivity analysis for the effect of removal of individual studies on miscarriage rates

| Included studies             | Excluded study               | Odds ratio (95% CI) | I <sup>2</sup> |
|------------------------------|------------------------------|---------------------|----------------|
| All                          | None                         | 0.28 (0.13, 0.60)   | 0%             |
| Bradley <i>et al.</i> , 2016 | Alharbi <i>et al.</i> , 2020 | 0.25 (0.11, 0.57)   | 4%             |
| Esteves <i>et al.</i> , 2015 |                              |                     |                |
| Greco <i>et al.</i> , 2005   |                              |                     |                |
| Herrero <i>et al.</i> , 2019 |                              |                     |                |
| Pabuccu <i>et al.</i> , 2017 |                              |                     |                |
| Zhang <i>et al.</i> , 2019   |                              |                     |                |
| Alharbi <i>et al.</i> , 2020 | Bradley <i>et al.</i> , 2016 | 0.22 (0.09, 0.52)   | 0%             |
| Esteves <i>et al.</i> , 2015 |                              |                     |                |
| Greco <i>et al.</i> , 2005   |                              |                     |                |
| Herrero <i>et al.</i> , 2019 |                              |                     |                |
| Pabuccu <i>et al.</i> , 2017 |                              |                     |                |
| Zhang <i>et al.</i> , 2019   |                              |                     |                |
| Alharbi <i>et al.</i> , 2020 | Esteves <i>et al.</i> , 2015 | 0.34 (0.13, 0.91)   | 9%             |
| Bradley <i>et al.</i> , 2016 |                              |                     |                |
| Greco <i>et al.</i> , 2005   |                              |                     |                |
| Herrero <i>et al.</i> , 2019 |                              |                     |                |
| Pabuccu <i>et al.</i> , 2017 |                              |                     |                |
| Zhang <i>et al.</i> , 2019   |                              |                     |                |

**Table S7** (continued)



Table S7 (continued)

| Included studies                                                                                                                                                                           | Excluded study               | Odds ratio (95% CI) | I <sup>2</sup> |
|--------------------------------------------------------------------------------------------------------------------------------------------------------------------------------------------|------------------------------|---------------------|----------------|
| Alharbi <i>et al.</i> , 2020<br>Bradley <i>et al.</i> , 2016<br>Esteves <i>et al.</i> , 2015<br>Herrero <i>et al.</i> , 2019<br>Pabuccu <i>et al.</i> , 2017<br>Zhang <i>et al.</i> , 2019 | Greco <i>et al.</i> , 2005   | 0.31 (0.14, 0.68)   | 0%             |
| Alharbi <i>et al.</i> , 2020<br>Bradley <i>et al.</i> , 2016<br>Esteves <i>et al.</i> , 2015<br>Greco <i>et al.</i> , 2005<br>Pabuccu <i>et al.</i> , 2017<br>Zhang <i>et al.</i> , 2019   | Herrero <i>et al.</i> , 2019 | 0.27 (0.12, 0.59)   | 9%             |
| Alharbi <i>et al.</i> , 2020<br>Bradley <i>et al.</i> , 2016<br>Esteves <i>et al.</i> , 2015<br>Greco <i>et al.</i> , 2005<br>Herrero <i>et al.</i> , 2019<br>Zhang <i>et al.</i> , 2019   | Pabuccu <i>et al.</i> , 2017 | 0.28 (0.13, 0.63)   | 14%            |
| Alharbi <i>et al.</i> , 2020<br>Bradley <i>et al.</i> , 2016<br>Esteves <i>et al.</i> , 2015<br>Greco <i>et al.</i> , 2005<br>Herrero <i>et al.</i> , 2019<br>Pabuccu <i>et al.</i> , 2017 | Zhang <i>et al.</i> , 2019   | 0.33 (0.15, 0.93)   | 0%             |

CI, confidence interval.

**Table S8** Certainty of evidence and summary effect estimates assessed by GRADE frame of the study outcomes\*

| Outcomes | Summary of findings |                     | Quality assessment |                            |                           |                          |                           | Certainty of evidence <sup>#</sup> |
|----------|---------------------|---------------------|--------------------|----------------------------|---------------------------|--------------------------|---------------------------|------------------------------------|
|          | No. studies         | OR (95% CI)         | Study design*      | Inconsistency <sup>†</sup> | Indirectness <sup>‡</sup> | Imprecision <sup>‡</sup> | Other consideration       |                                    |
| SDF      | 4                   | 25.8 (16.81, 34.82) | Serious            | Serious                    | Serious                   | Serious                  | Large effect size (OR >2) | ⊕○○○ (very low)                    |
| FR       | 6                   | 0.87 (0.67, 1.12)   | Not serious        | Serious                    | Serious                   | Serious                  | None                      | ⊕○○○ (very low)                    |
| CPR      | 8                   | 2.36 (1.71, 3.24)   | Serious            | Not serious                | Serious                   | Not serious              | Large effect size (OR >2) | ⊕⊕○○ (low)                         |
| LBR      | 6                   | 3.10 (2.13, 4.51)   | Serious            | Not serious                | Serious                   | Not serious              | Large effect size (OR >2) | ⊕⊕○○ (low)                         |
| MR       | 6                   | 0.28 (0.13, 0.60)   | Serious            | Not serious                | Serious                   | Not serious              | None                      | ⊕⊕○○ (low)                         |

\*, downgraded by one level if >25% of participants in this comparison were from studies at high risk of bias; <sup>†</sup>, downgraded by one level if heterogeneity ( $I^2$ ) >50%; <sup>‡</sup>, downgraded by one level if >25% of included studies were monocenter-based; <sup>‡</sup>, downgraded by one level if the limits of the 95% CI for risk estimates are wide or cross a minimally important difference of 10% for outcomes (RR: 0.9–1.1); <sup>#</sup>, high quality: very confident that the true effect lies close to that of the estimate of the effect; moderate quality: moderately confident in the effect estimate, and the true effect is likely to be close to the estimate of the effect, but there is a possibility that it is substantially different; low quality: confidence in the effect estimate is limited, and the true effect could be substantially different from the estimate of the effect; very low quality: very little confidence in the effect estimate, and the true effect is likely to be substantially different from the estimate of effect. GRADE, the Grading of Recommendations Assessment, Development, and Evaluation; OR, odds ratio; CI, confidence interval; SDF, sperm DNA fragmentation; FR, fertilization rate; CPR, clinical pregnancy rate; LBR, live birth rate; MR, miscarriage rate; RR, relative risk.
